# Supplementary material for: Myrtle-Functionalized Nanofibers Modulate Vaginal Cell Population Behavior While Counteracting Microbial Proliferation
Source: MDPI journal article supplement (doi:10.3390/plants11121577), 2022-06-15

## Supplementary material

HPLC-DAD chromatograms of phenolic compounds in *Myrtus communis* L. sample's extracts at (A) 280nm, (B) 360nm, and (C) 520nm: (I) Leaves, (II) Seeds, (III) fruits (Peel+Pulp).

(1) Gallic acid; (2) Myricetin 3-O-galactoside; (3) Vitexin; (4) Myricetin 3-O-rhamnoside; (5) Quercetin 3-O-galactoside; (6) Quercetin 3-O-glucoside, (7) Quercetin 3-O-rhamnoside; (8) Ellagic acid; (9) Cyanidin 3-O-glucoside; (10) Petunidin 3-O-glucoside; (11) Peonidin 3-O-glucoside; (12) Malvidin 3-O-glucoside; (\$) Hydrolisable tannins

### I

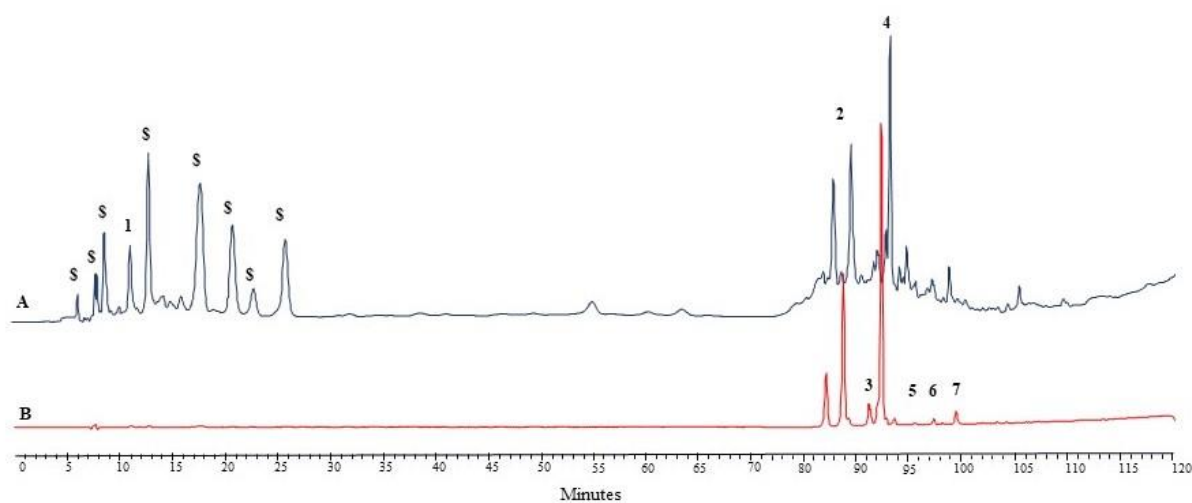

### II

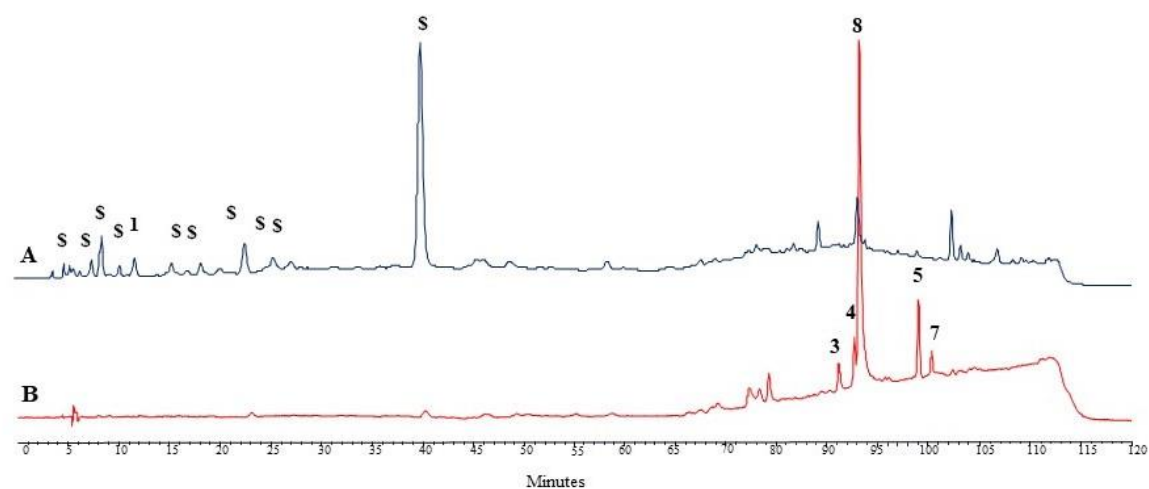

III

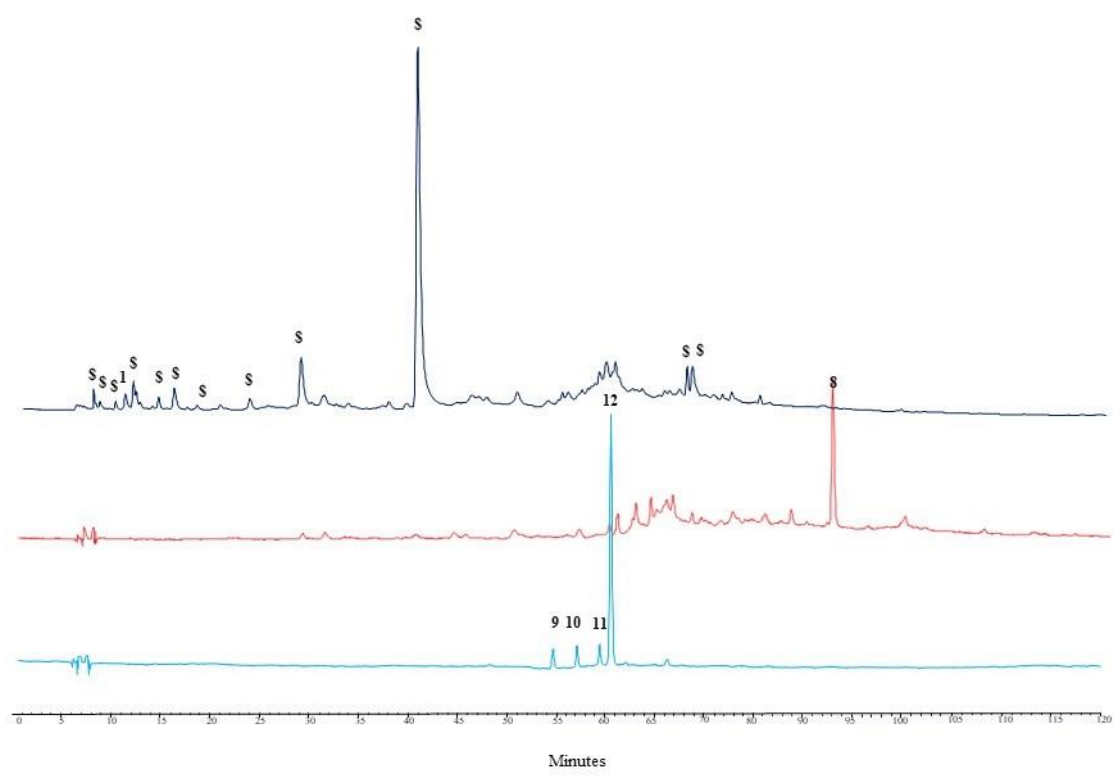

Supplement: s1 [file s1]
